# Supplementary material for: Selection of Pneumocystis jirovecii Inosine 5′-Monophosphate Dehydrogenase Mutants in Solid Organ Transplant Recipients: Implication of Mycophenolic Acid
Source: MDPI journal article supplement (doi:10.3390/jof7100849), 2021-10-10
Supplement: s1 [file s1]

Figure S2. Alignment of *impdh* CDS and genomic sequences of the two *P.jirovecii* genome assemblies (Ma *et al.*, 2016, indicated as Ma ; Cissé *et al.*, 2012, indicated as Cisse) [17,18]. Residues shown in bold and highlighted in grey are synonymous SNPs. Dashes indicate gaps. Nucleotide positions where SNPs were identified in the present study are indicated with asterisks.

|                        |                                                                          |      |
|------------------------|--------------------------------------------------------------------------|------|
| Pj_impdh_Ma_genomic    | ATGGAGGAATTAGAAACAGAAGAATATTTAAGTGAATGTAAAGCTGAAGAAGCAAAGGAAAAAACTTAAAG  | 70   |
| Pj_impdh_Ma_CDS        | ATGGAGGAATTAGAAACAGAAGAATATTTAAGTGAATGTAAAGCTGAAGAAGCAAAGGAAAAAACTTAAAG  | 70   |
| Pj_impdh_Cisse_genomic | ATGGAGGAATTAGAAACAGAAGAATATTTAAGTGAATGTAAAGCTGAAGAAGCAAAGGAAAAAACTTAAAG  | 70   |
| Pj_impdh_Cisse_CDS     | ATGGAGGAATTAGAAACAGAAGAATATTTAAGTGAATGTAAAGCTGAAGAAGCAAAGGAAAAAACTTAAAG  | 70   |
| *                      |                                                                          |      |
| Pj_impdh_Ma_genomic    | AATATGCAGAAAAAGTATGTAAATCAGAGTATTTTTATTGAAAATTAACAAAAATAAAAGGATGGATTA    | 140  |
| Pj_impdh_Ma_CDS        | AATATGCAGAAAAAG-----ATGGATTA                                             | 93   |
| Pj_impdh_Cisse_genomic | AATATGCAGAAAAAGTATGTAAATCAGAGTATTTTTATTGAAAATTAACAAAAATAAAAGGATGGATTA    | 140  |
| Pj_impdh_Cisse_CDS     | AATATGCAGAAAAAG-----ATGGATTA                                             | 93   |
| Pj_impdh_Ma_genomic    | GACGTGAATACTCTTATTCTTAGCCGGGTCAATGGAGGATTAACATATAATGATATAATTATTCTTCCGG   | 210  |
| Pj_impdh_Ma_CDS        | GACGTGAATACTCTTATTCTTAGCCGGGTCAATGGAGGATTAACATATAATGATATAATTATTCTTCCGG   | 163  |
| Pj_impdh_Cisse_genomic | GACGTGAATACTCTTATTCTTAGCCGGGTCAATGGAGGATTAACATATAATGATATAATTATTCTTCCGG   | 210  |
| Pj_impdh_Cisse_CDS     | GACGTGAATACTCTTATTCTTAGCCGGGTCAATGGAGGATTAACATATAATGATATAATTATTCTTCCGG   | 163  |
| Pj_impdh_Ma_genomic    | GATATATTGATTTTGATGCAAGCTCAGTATCTCTTGAAAGTCGTATTACGAGAAATATAGTTATAAAAAAC  | 280  |
| Pj_impdh_Ma_CDS        | GATATATTGATTTTGATGCAAGCTCAGTATCTCTTGAAAGTCGTATTACGAGAAATATAGTTATAAAAAAC  | 233  |
| Pj_impdh_Cisse_genomic | GATATATTGATTTTGATGCAAGCTCAGTATCTCTTGAAAGTCGTATTACGAGAAATATAGTTATAAAAAAC  | 280  |
| Pj_impdh_Cisse_CDS     | GATATATTGATTTTGATGCAAGCTCAGTATCTCTTGAAAGTCGTATTACGAGAAATATAGTTATAAAAAAC  | 233  |
| Pj_impdh_Ma_genomic    | GCCATTTATGAGGTTTTCATGTTATTTTTATTGCTAGAGTATTAATGTATAGTTCTCCAATGGATACTGT   | 350  |
| Pj_impdh_Ma_CDS        | GCCATTTATGAG-----TTCTCCAATGGATACTGT                                      | 263  |
| Pj_impdh_Cisse_genomic | GCCATTTATGAGGTTTTCATGTTATTTTTATTGCTAGAGTATTAATGTATAGTTCTCCAATGGATACTGT   | 350  |
| Pj_impdh_Cisse_CDS     | GCCATTTATGAG-----TTCTCCAATGGATACTGT                                      | 263  |
| Pj_impdh_Ma_genomic    | TACTGAATCGGATATGGCGATTAACATGGCACTCCTAGGGGGCATTGGAGTTATTACCATAAATTGTACA   | 420  |
| Pj_impdh_Ma_CDS        | TACTGAATCGGATATGGCGATTAACATGGCACTCCTAGGGGGCATTGGAGTTATTACCATAAATTGTACA   | 333  |
| Pj_impdh_Cisse_genomic | TACTGAATCGGATATGGCGATTAACATGGCACTCCTAGGGGGCATTGGAGTTATTACCATAAATTGTACA   | 420  |
| Pj_impdh_Cisse_CDS     | TACTGAATCGGATATGGCGATTAACATGGCACTCCTAGGGGGCATTGGAGTTATTACCATAAATTGTACA   | 333  |
| Pj_impdh_Ma_genomic    | ATAGAAGAACAGACGGAATGGTTAGAAAAGTTAAAAAATTGAAAATGGATTTATAACATCACCTATTG     | 490  |
| Pj_impdh_Ma_CDS        | ATAGAAGAACAGACGGAATGGTTAGAAAAGTTAAAAAATTGAAAATGGATTTATAACATCACCTATTG     | 403  |
| Pj_impdh_Cisse_genomic | ATAGAAGAACAGACGGAATGGTTAGAAAAGTTAAAAAATTGAAAATGGATTTATAACATCACCTATTG     | 490  |
| Pj_impdh_Cisse_CDS     | ATAGAAGAACAGACGGAATGGTTAGAAAAGTTAAAAAATTGAAAATGGATTTATAACATCACCTATTG     | 403  |
| Pj_impdh_Ma_genomic    | TATTGTCACCAAACACAGAGTGGTTGATGTTTCGTAAAATAAAAGAAGAGCTTGGATTAGTGGGATTCC    | 560  |
| Pj_impdh_Ma_CDS        | TATTGTCACCAAACACAGAGTGGTTGATGTTTCGTAAAATAAAAGAAGAGCTTGGATTAGTGGGATTCC    | 473  |
| Pj_impdh_Cisse_genomic | TATTGTCACCAAACACAGAGTGGTTGATGTTTCGTAAAATAAAAGAAGAGCTTGGATTAGTGGGATTCC    | 560  |
| Pj_impdh_Cisse_CDS     | TATTGTCACCAAACACAGAGTGGTTGATGTTTCGTAAAATAAAAGAAGAGCTTGGATTAGTGGGATTCC    | 473  |
| Pj_impdh_Ma_genomic    | AATAACAGGTAACATATAAAAAATATAGACTGAAAATATGATGAATTTATTTTTTAACTTTTCGTTCTACC  | 630  |
| Pj_impdh_Ma_CDS        | AATAACAG-----                                                            | 481  |
| Pj_impdh_Cisse_genomic | AATAACAGGTAACATATAAAAAATATAGACTGAAAATATGATGAATTTATTTTTTAACTTTTCGTTCTACC  | 630  |
| Pj_impdh_Cisse_CDS     | AATAACAG-----                                                            | 481  |
| Pj_impdh_Ma_genomic    | GTATATCACTTATTAGTTGTGTGGAACATTATCTGATTGGTTTAAATATATATCATTATATGCGATG      | 700  |
| Pj_impdh_Ma_CDS        | -----                                                                    | 481  |
| Pj_impdh_Cisse_genomic | GTATATCACTTATTAGTTGTGTGGAACATTATCTGATTGGTTTAAATATATATCATTATATGCGATG      | 700  |
| Pj_impdh_Cisse_CDS     | -----                                                                    | 481  |
| Pj_impdh_Ma_genomic    | GATAATAATAATGTGTCTAGATACAGGAAAACTCAACGGGAAGCTTTTGGGGATTGTTACGTTTAGAGAT   | 770  |
| Pj_impdh_Ma_CDS        | -----ATACAGGAAAACTCAACGGGAAGCTTTTGGGGATTGTTACGTTTAGAGAT                  | 531  |
| Pj_impdh_Cisse_genomic | GATAATAATAATGTGTCTAGATACAGGAAAACTCAACGGGAAGCTTTTGGGGATTGTTACGTTTAGAGAT   | 770  |
| Pj_impdh_Cisse_CDS     | -----ATACAGGAAAACTCAACGGGAAGCTTTTGGGGATTGTTACGTTTAGAGAT                  | 531  |
| Pj_impdh_Ma_genomic    | ATTACAGTTTCATGTTAACGATTCTTCATTACTTTTCGGAAGTCATGACAAAAGATTTAGTAACAGGATCAG | 840  |
| Pj_impdh_Ma_CDS        | ATTACAGTTTCATGTTAACGATTCTTCATTACTTTTCGGAAGTCATGACAAAAGATTTAGTAACAGGATCAG | 601  |
| Pj_impdh_Cisse_genomic | ATTACAGTTTCATGTTAACGATTCTTCATTACTTTTCGGAAGTCATGACAAAAGATTTAGTAACAGGATCAG | 840  |
| Pj_impdh_Cisse_CDS     | ATTACAGTTTCATGTTAACGATTCTTCATTACTTTTCGGAAGTCATGACAAAAGATTTAGTAACAGGATCAG | 601  |
| Pj_impdh_Ma_genomic    | AGGGTATTACCCCTTGAAGAGGCAAATGAAATCCTCCGTTCTTCTAAAAAAGGGAAATTGCCTATAGTTGA  | 910  |
| Pj_impdh_Ma_CDS        | AGGGTATTACCCCTTGAAGAGGCAAATGAAATCCTCCGTTCTTCTAAAAAAGGGAAATTGCCTATAGTTGA  | 671  |
| Pj_impdh_Cisse_genomic | AGGGTATTACCCCTTGAAGAGGCAAATGAAATCCTCCGTTCTTCTAAAAAAGGGAAATTGCCTATAGTTGA  | 910  |
| Pj_impdh_Cisse_CDS     | AGGGTATTACCCCTTGAAGAGGCAAATGAAATCCTCCGTTCTTCTAAAAAAGGGAAATTGCCTATAGTTGA  | 671  |
| *                      |                                                                          |      |
| Pj_impdh_Ma_genomic    | TAAGAATGGGAATCTTACAGCTCTTCTTTCTCGCTCTGATTTAATGAAAAATCTTCATTTCCCATTTATCA  | 980  |
| Pj_impdh_Ma_CDS        | TAAGAATGGGAATCTTACAGCTCTTCTTTCTCGCTCTGATTTAATGAAAAATCTTCATTTCCCATTTATCA  | 741  |
| Pj_impdh_Cisse_genomic | TAAGAATGGGAATCTTACAGCTCTTCTTTCTCGCTCTGATTTAATGAAAAATCTTCATTTCCCATTTATCA  | 980  |
| Pj_impdh_Cisse_CDS     | TAAGAATGGGAATCTTACAGCTCTTCTTTCTCGCTCTGATTTAATGAAAAATCTTCATTTCCCATTTATCA  | 741  |
| *                      |                                                                          |      |
| Pj_impdh_Ma_genomic    | TCTAAATTACCCGACTCTAAACAATTAATTTGTGCAGCAGCAGTTGGAACACGACCTGAAGATAGAATTA   | 1050 |
| Pj_impdh_Ma_CDS        | TCTAAATTACCCGACTCTAAACAATTAATTTGTGCAGCAGCAGTTGGAACACGACCTGAAGATAGAATTA   | 811  |
| Pj_impdh_Cisse_genomic | TCTAAATTACCCGACTCTAAACAATTAATTTGTGCAGCAGCAGTTGGAACACGACCTGAAGATAGAATTA   | 1050 |
| Pj_impdh_Cisse_CDS     | TCTAAATTACCCGACTCTAAACAATTAATTTGTGCAGCAGCAGTTGGAACACGACCTGAAGATAGAATTA   | 811  |

|                        |                                                                          |      |
|------------------------|--------------------------------------------------------------------------|------|
| Pj_impdh_Ma_genomic    | GATTAAAAATATTTAGTTGACGCGGGATTAGACATTGTTGTTCTAGATTCAAGTCAGGGGAATTCTATCTA  | 1120 |
| Pj_impdh_Ma_CDS        | GATTAAAAATATTTAGTTGACGCGGGATTAGACATTGTTGTTCTAGATTCAAGTCAGGGGAATTCTATCTA  | 881  |
| Pj_impdh_Cisse_genomic | GATTAAAAATATTTAGTTGACGCGGGATTAGACATTGTTGTTCTAGATTCAAGTCAGGGGAATTCTATCTA  | 1120 |
| Pj_impdh_Cisse_CDS     | GATTAAAAATATTTAGTTGACGCGGGATTAGACATTGTTGTTCTAGATTCAAGTCAGGGGAATTCTATCTA  | 881  |
|                        |                                                                          |      |
| Pj_impdh_Ma_genomic    | TCAAATTAATATGATTAAATGGATAAAAAAGGAATTTCTGGTTTGTAGAAATATAGCTGGAACGTTGTA    | 1190 |
| Pj_impdh_Ma_CDS        | TCAAATTAATATGATTAAATGGATAAAAAAGGAATTTCTGGTTTGTAGAAATATAGCTGGAACGTTGTA    | 951  |
| Pj_impdh_Cisse_genomic | TCAAATTAATATGATTAAATGGATAAAAAAGGAATTTCTGGTTTGTAGAAATATAGCTGGAACGTTGTA    | 1190 |
| Pj_impdh_Cisse_CDS     | TCAAATTAATATGATTAAATGGATAAAAAAGGAATTTCTGGTTTGTAGAAATATAGCTGGAACGTTGTA    | 951  |
|                        |                                                                          |      |
| Pj_impdh_Ma_genomic    | ACTAGAGAACAAGCTGCTAATTTAATATCAGCTGGAGCAGACGCATTGCGAATAGGTATGGGATCAGGGT   | 1260 |
| Pj_impdh_Ma_CDS        | ACTAGAGAACAAGCTGCTAATTTAATATCAGCTGGAGCAGACGCATTGCGAATAGGTATGGGATCAGGGT   | 1019 |
| Pj_impdh_Cisse_genomic | ACTAGAGAACAAGCTGCTAATTTAATATCAGCTGGAGCAGACGCATTGCGAATAGGTATGGGATCAGGGT   | 1260 |
| Pj_impdh_Cisse_CDS     | ACTAGAGAACAAGCTGCTAATTTAATATCAGCTGGAGCAGACGCATTGCGAATAGGTATGGGATCAGGGT   | 1019 |
|                        |                                                                          |      |
| Pj_impdh_Ma_genomic    | ATATTAATCTATATTTTTTGGAGCTTATAAATTAATATTGTCTAGTTCAATTTGTATAACACAGTAATAAT  | 1330 |
| Pj_impdh_Ma_CDS        | -----TTCAATTTGTATAACACA-----                                             | 1037 |
| Pj_impdh_Cisse_genomic | ATATTAATCTATATTTTTTGGAGCTTATAAATTAATATTGTCTAGTTCAATTTGTATAACACAGTAATAAT  | 1330 |
| Pj_impdh_Cisse_CDS     | -----TTCAATTTGTATAACACA-----                                             | 1037 |
|                        |                                                                          |      |
| Pj_impdh_Ma_genomic    | TTTTTTCGTTTAATTATTAAAAATTGATTTTTTGTAGAGAAGTAATGGCAGTTGGGCGGCCCTCAAGTATTT | 1400 |
| Pj_impdh_Ma_CDS        | -----AGAAGTAATGGCAGTTGGGCGGCCCTCAAG-----                                 | 1066 |
| Pj_impdh_Cisse_genomic | TTTTTTCGTTTAATTATTAAAAATTGATTTTTTGTAGAGAAGTAATGGCAGTTGGGCGGCCCTCAAGTATTT | 1400 |
| Pj_impdh_Cisse_CDS     | -----AGAAGTAATGGCAGTTGGGCGGCCCTCAAG-----                                 | 1066 |
|                        |                                                                          |      |
| Pj_impdh_Ma_genomic    | ATTACTTAATAAGTAGATATTATTACTAATTTCAATATTATAGGCAACAGCTGTTTATGCTGTATCAGAA   | 1470 |
| Pj_impdh_Ma_CDS        | -----CAACAGCTGTTTATGCTGTATCAGAA                                          | 1092 |
| Pj_impdh_Cisse_genomic | ATTACTTAATAAGTAGATATTATTACTAATTTCAATATTATAGGCAACAGCTGTTTATGCTGTATCAGAA   | 1470 |
| Pj_impdh_Cisse_CDS     | -----CAACAGCTGTTTATGCTGTATCAGAA                                          | 1092 |
|                        |                                                                          |      |
| Pj_impdh_Ma_genomic    | TTTGCATCTAAATTCGGAGTACCAACTATTGCAGATGGAGGAATCGAAAACATTGGGTAAATAAAAACAT   | 1540 |
| Pj_impdh_Ma_CDS        | TTTGCATCTAAATTCGGAGTACCAACTATTGCAGATGGAGGAATCGAAAACATTG-----             | 1147 |
| Pj_impdh_Cisse_genomic | TTTGCATCTAAATTCGGAGTACCAACTATTGCAGATGGAGGAATCGAAAACATTGGGTAAATAAAAACAT   | 1540 |
| Pj_impdh_Cisse_CDS     | TTTGCATCTAAATTCGGAGTACCAACTATTGCAGATGGAGGAATCGAAAACATTG-----             | 1147 |
|                        |                                                                          |      |
| Pj_impdh_Ma_genomic    | AATATATAATTCATAGATTTATCTAAATAGTCATATAACAAAAGCACTAGCATTAGGAGCATCTGCTGTT   | 1610 |
| Pj_impdh_Ma_CDS        | -----GTCATATAACAAAAGCACTAGCATTAGGAGCATCTGCTGTT                           | 1188 |
| Pj_impdh_Cisse_genomic | AATATATAATTCATAGATTTATCTAAATAGTCATATAACAAAAGCACTAGCATTAGGAGCATCTGCTGTT   | 1610 |
| Pj_impdh_Cisse_CDS     | -----GTCATATAACAAAAGCACTAGCATTAGGAGCATCTGCTGTT                           | 1188 |
|                        |                                                                          |      |
| Pj_impdh_Ma_genomic    | ATGATGGGCAATCTTTTAGCTGGAACAGCAGAATCTCCTGGTCAATATTATTACAGAGATGGTCAACGTT   | 1680 |
| Pj_impdh_Ma_CDS        | ATGATGGGCAATCTTTTAGCTGGAACAGCAGAATCTCCTGGTCAATATTATTACAGAGATGGTCAACGTT   | 1258 |
| Pj_impdh_Cisse_genomic | ATGATGGGCAATCTTTTAGCTGGAACAGCAGAATCTCCTGGTCAATATTATTACAGAGATGGTCAACGTT   | 1680 |
| Pj_impdh_Cisse_CDS     | ATGATGGGCAATCTTTTAGCTGGAACAGCAGAATCTCCTGGTCAATATTATTACAGAGATGGTCAACGTT   | 1258 |
|                        |                                                                          |      |
| Pj_impdh_Ma_genomic    | TAAAATCATATCGTGAATGGGCTCCATTGATGCTATGGAACATTTATCGGGAAAAGGCAAAGGAGAAAA    | 1750 |
| Pj_impdh_Ma_CDS        | TAAAATCATATCGTGAATGGGCTCCATTGATGCTATGGAACATTTATCGGGAAAAGGCAAAGGAGAAAA    | 1328 |
| Pj_impdh_Cisse_genomic | TAAAATCATATCGTGAATGGGCTCCATTGATGCTATGGAACATTTATCGGGAAAAGGCAAAGGAGAAAA    | 1750 |
| Pj_impdh_Cisse_CDS     | TAAAATCATATCGTGAATGGGCTCCATTGATGCTATGGAACATTTATCGGGAAAAGGCAAAGGAGAAAA    | 1328 |
|                        |                                                                          |      |
| Pj_impdh_Ma_genomic    | TGCCGCATCTAGTCGTTATTTTGGTGAAACAGATACTATTTCGTGTTGCCCAAGGTGTTTCAGGAAGTGTT  | 1820 |
| Pj_impdh_Ma_CDS        | TGCCGCATCTAGTCGTTATTTTGGTGAAACAGATACTATTTCGTGTTGCCCAAGGTGTTTCAGGAAGTGTT  | 1398 |
| Pj_impdh_Cisse_genomic | TGCCGCATCTAGTCGTTATTTTGGTGAAACAGATACTATTTCGTGTTGCCCAAGGTGTTTCAGGAAGTGTT  | 1820 |
| Pj_impdh_Cisse_CDS     | TGCCGCATCTAGTCGTTATTTTGGTGAAACAGATACTATTTCGTGTTGCCCAAGGTGTTTCAGGAAGTGTT  | 1398 |
|                        |                                                                          |      |
| Pj_impdh_Ma_genomic    | GTGGATAAAGGATCATTACATGTATATCTTCCTTATTTACGAACCGGGCTTCAACATTCATTACAAGATA   | 1890 |
| Pj_impdh_Ma_CDS        | GTGGATAAAGGATCATTACATGTATATCTTCCTTATTTACGAACCGGGCTTCAACATTCATTACAAGATA   | 1468 |
| Pj_impdh_Cisse_genomic | GTGGATAAAGGATCATTACATGTATATCTTCCTTATTTACGAACCGGGCTTCAACATTCATTACAAGATA   | 1890 |
| Pj_impdh_Cisse_CDS     | GTGGATAAAGGATCATTACATGTATATCTTCCTTATTTACGAACCGGGCTTCAACATTCATTACAAGATA   | 1468 |
|                        |                                                                          |      |
| Pj_impdh_Ma_genomic    | TCGGGTGTACGAAATTTAACGGAACTAAGAAGACAGGTACGGAAAAAAATGTACGTTTGAACCTTCGGAC   | 1960 |
| Pj_impdh_Ma_CDS        | TCGGGTGTACGAAATTTAACGGAACTAAGAAGACAGGTACGGAAAAAAATGTACGTTTGAACCTTCGGAC   | 1538 |
| Pj_impdh_Cisse_genomic | TCGGGTGTACGAAATTTAACGGAACTAAGAAGACAGGTACGGAAAAAAATGTACGTTTGAACCTTCGGAC   | 1960 |
| Pj_impdh_Cisse_CDS     | TCGGGTGTACGAAATTTAACGGAACTAAGAAGACAGGTACGGAAAAAAATGTACGTTTGAACCTTCGGAC   | 1538 |
|                        |                                                                          |      |
| Pj_impdh_Ma_genomic    | TGTTGCAAGTCAATTAGAAGGGAATGTCCACGGTATTTATCAACTTTTAATTAACCTAATTTAATTTAT    | 2030 |
| Pj_impdh_Ma_CDS        | TGTTGCAAGTCAATTAGAAGGGAATGTCCACGG-----                                   | 1571 |
| Pj_impdh_Cisse_genomic | TGTTGCAAGTCAATTAGAAGGGAATGTCCACGGTATTTATCAACTTTTAATTAACCTAATTTAATTTAT    | 2030 |
| Pj_impdh_Cisse_CDS     | TGTTGCAAGTCAATTAGAAGGGAATGTCCACGG-----                                   | 1571 |
|                        |                                                                          |      |
| Pj_impdh_Ma_genomic    | ACTAGGGCTGCATTCTTATAAAAAAGAACTCTGGAGTTGA                                 | 2070 |
| Pj_impdh_Ma_CDS        | -----GCTGCATTCTTATAAAAAAGAACTCTGGAGTTGA                                  | 1605 |
| Pj_impdh_Cisse_genomic | ACTAGGGCTGCATTCTTATAAAAAAGAACTCTGGAGTTGA                                 | 2070 |
| Pj_impdh_Cisse_CDS     | -----GCTGCATTCTTATAAAAAAGAACTCTGGAGTTGA                                  | 1605 |
