# Supplementary material for: Selection of Pneumocystis jirovecii Inosine 5′-Monophosphate Dehydrogenase Mutants in Solid Organ Transplant Recipients: Implication of Mycophenolic Acid
Source: MDPI journal article supplement (doi:10.3390/jof7100849), 2021-10-10
Supplement: s1 [file s1]

**Table S1.** Nucleotide sequences of primers used for amplification of *Pneumocystis jirovecii* *impdh* gene

| Primer pair | Primer designation | 5'-3' nucleotide sequence | Amplicon size (bp) |
|-------------|--------------------|---------------------------|--------------------|
| <b>1</b>    | 2116F              | TGGTGACAATACAATAGGTGATG   | 743                |
|             | 2859R              | CATTCGTGGCGGAAGATT        |                    |
| <b>2</b>    | 1537F              | CTAATCCCGCGTCAACTAAATA    | 915                |
|             | 2452R              | CGGGTCAATGGAGGATTAAC      |                    |
| <b>3</b>    | 1109F              | CCATCTGCAATAGTTGGTACTC    | 681                |
|             | 1790R              | AGTAACAGGATCAGAGGGTATT    |                    |
| <b>4</b>    | 745F               | GAAGCCCGGTTTCGTAAATAAG    | 846                |
|             | 1591R              | GGAACACGACCTGAAGATAGA     |                    |
| <b>5</b>    | 616F               | GATAAATACCGTGGACATTCCC    | 376                |
|             | 992R               | TTTAGCTGGAACAGCAGAATC     |                    |
| <b>6</b>    | 295F               | TCCTGAAGAATCTCGCTCAATA    | 512                |
|             | 807R               | CAGGAAGTGTTGTGGATAAAGG    |                    |

F : Forward; R : Reverse
