# Supplementary material for: Selection of Pneumocystis jirovecii Inosine 5′-Monophosphate Dehydrogenase Mutants in Solid Organ Transplant Recipients: Implication of Mycophenolic Acid
Source: MDPI journal article supplement (doi:10.3390/jof7100849), 2021-10-10
Supplement: s1 [file s1]

Table S2. List of the IMPDH protein sequences from *Pneumocystis* species and other fungi that were aligned with the IMPDH sequences obtained in the present study.

| Organism – strain                     | Abbreviation              | Protein sequence                    | Protein length (aa) | Comments                                                                               |
|---------------------------------------|---------------------------|-------------------------------------|---------------------|----------------------------------------------------------------------------------------|
| <i>Pneumocystis jirovecii</i>         | PjIMPDH-Ma                | Uniprot A0A0W4ZU90                  | 534                 | IMPDH from Ma et al. [17]                                                              |
| <i>Pneumocystis jirovecii</i>         | PjIMPDH-Cissé             | Uniprot L0P7N3                      | 534                 | IMPDH from Cissé et al. [18]                                                           |
| <i>Pneumocystis carinii</i>           | PcIMPDH                   | Uniprot A0A0W4ZEI8                  | 529                 | IMPDH from Ma et al. [17]                                                              |
| <i>Pneumocystis murina</i>            | PmIMPDH                   | Uniprot M7NKD5                      | 529                 | IMPDH from Ma et al. [18]                                                              |
| <i>Meyerozyma guilliermondii</i>      | MgIMPDH1-MPA <sup>S</sup> | Uniprot A5DL50                      | 521                 | MPA-sensitive IMPDH produced by <i>IMH3.1</i> gene <sup>a</sup>                        |
| <i>Meyerozyma guilliermondii</i>      | MgIMPDH2-MPA <sup>R</sup> | Uniprot A5DLR4                      | 521                 | MPA-resistant IMPDH produced by <i>IMH3.2</i> gene <sup>a</sup>                        |
| <i>Saccharomyces cerevisiae</i> S288C | ScIMPDH2-MPA <sup>R</sup> | Uniprot P38697                      | 523                 | MPA-resistant IMPDH produced by <i>IMD2</i> gene <sup>b</sup>                          |
| <i>Saccharomyces cerevisiae</i> S288C | ScIMPDH3-MPA <sup>S</sup> | Uniprot P50095                      | 523                 | MPA-sensitive IMPDH produced by <i>IMD3</i> gene <sup>b</sup>                          |
| <i>Candida albicans</i> EC3           | CaIMPDH-MPA <sup>R</sup>  | GenBank AAW65379.1                  | 521                 | MPA-resistant IMPDH <sup>c</sup>                                                       |
| <i>Candida albicans</i> SC5314        | CaIMPDH-MPA <sup>S</sup>  | Uniprot Q59Q46                      | 521                 | MPA-sensitive IMPDH                                                                    |
| <i>Penicillium brevicompactum</i>     | PbIMPDHA-MPA <sup>R</sup> | Uniprot G4WT15                      | 537                 | MPA-resistant IMPDH (IMPDH-A)<br>Partial coding sequence missing N-terminal MPITASDAAP |
| <i>Aspergillus nidulans</i>           | AnIMPDH-MPA <sup>S</sup>  | Aspergillus Genome Database AN12478 | 546                 | MPA-sensitive IMPDH                                                                    |

<sup>a</sup> *Meyerozyma guilliermondii* genome harbors two genes (*IMH3.1* and *IMH3.2*) encoding IMPDH proteins. *IMH3.1* encodes a MPA-sensitive IMPDH whereas *IMH3.2* encodes a MPA-resistant IMPDH [22].

<sup>b</sup> *Saccharomyces cerevisiae* genome harbors four genes (*IMD1 – IMD4*) encoding IMPDH proteins. *IMD1*, *IMD3* and *IMD4* encode MPA-sensitive IMPDHs whereas *IMD2* encodes a MPA-resistant IMPDH [23].

<sup>c</sup> *Candida albicans* EC3 is a mutant strain of strain SC5314 selected under high concentration of MPA (10 µg/mL) [21].
