# Supplementary material for: Selection of Pneumocystis jirovecii Inosine 5′-Monophosphate Dehydrogenase Mutants in Solid Organ Transplant Recipients: Implication of Mycophenolic Acid
Source: MDPI journal article supplement (doi:10.3390/jof7100849), 2021-10-10
Supplement: s1 [file s1]

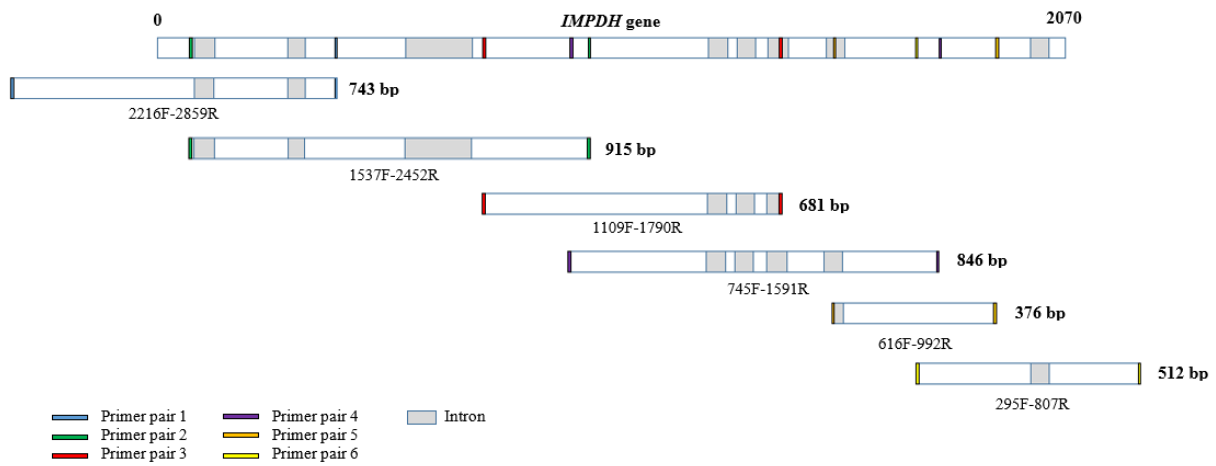

**Figure S1.** Description of PCR products obtained using the six primer pairs designed for *Pneumocystis jirovecii* *impdh* gene amplification
